# Supplementary material for: DAZAP1 facilitates the alternative splicing of KITLG to promote multiple myeloma cell proliferation via ERK signaling pathway
Source: publisher site journal article supplement (doi:10.18632/aging.204326), 2022-10-13
Supplement: Supplementary file [file aging-v14i19-204326-supplementary-material-SD1.pdf]

**SUPPLEMENTARY FIGURE**

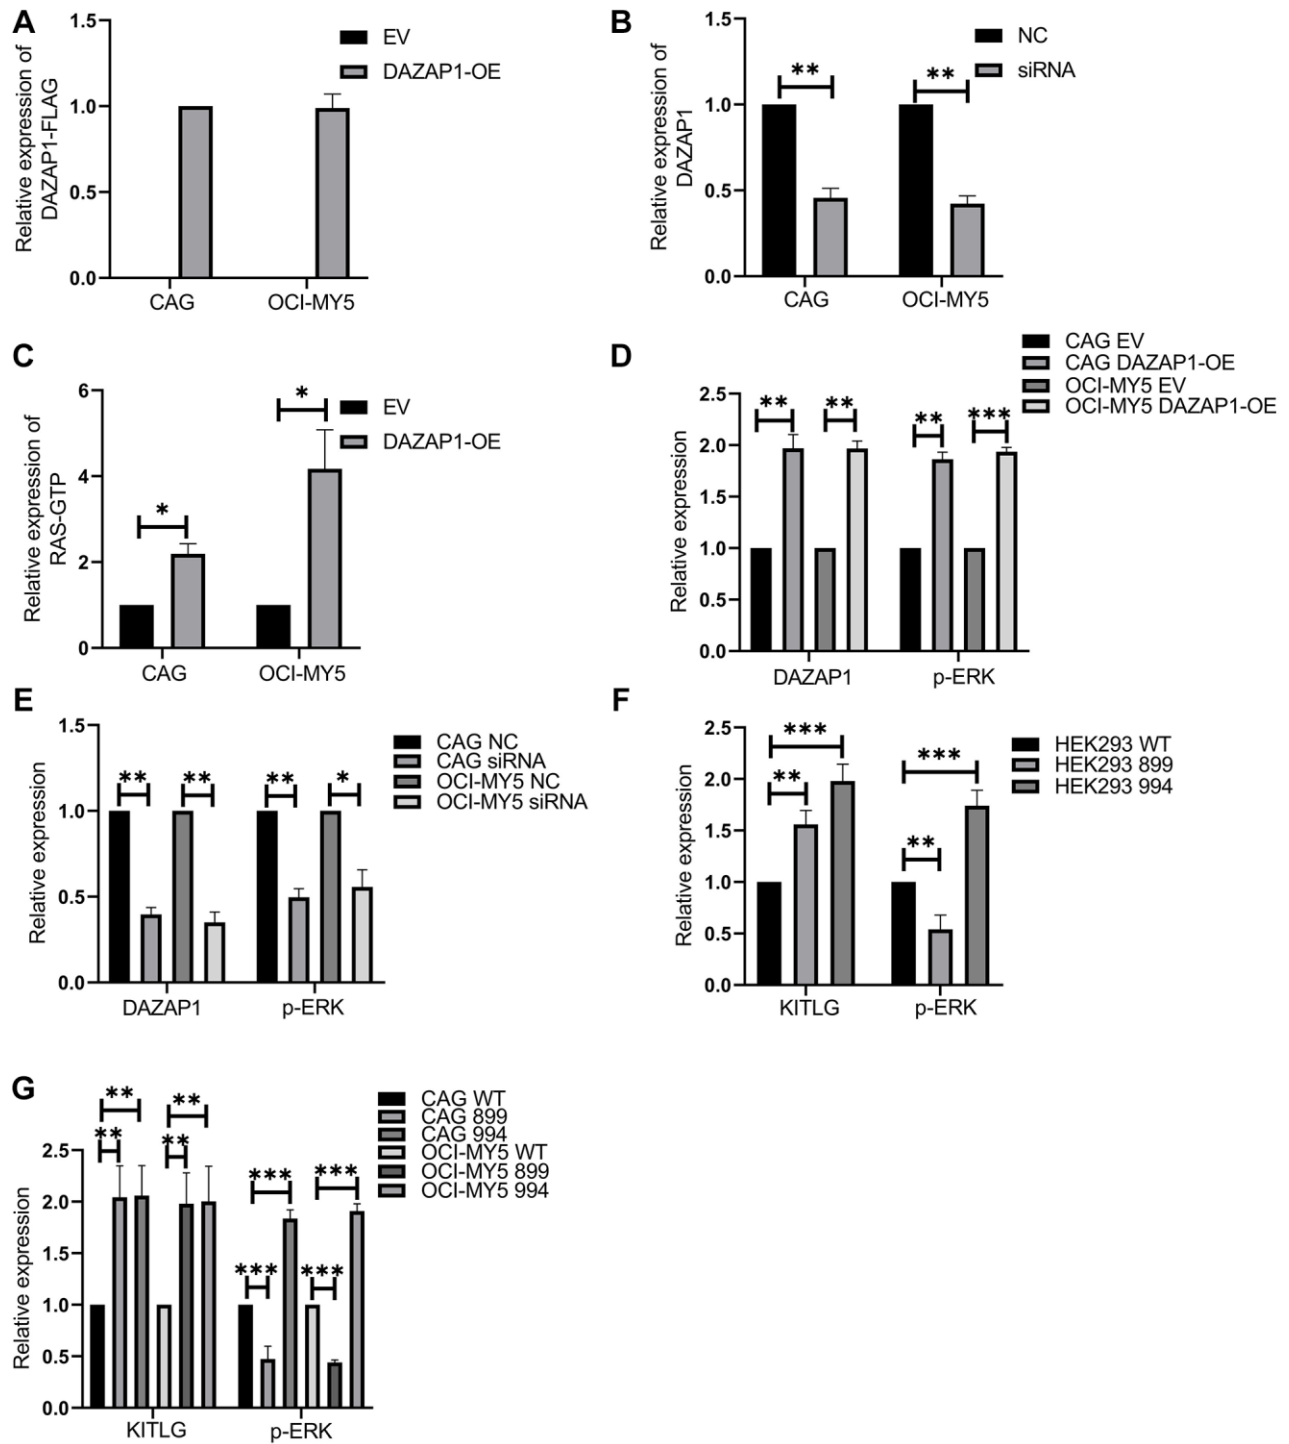

**Supplementary Figure 1. The quantitative analyses of WB for the detection of the indicated protein expression. (A and B)** Confirmation of DAZAP1 expression in DAZAP1-OE/siRNA MM cells. **(C)** Relative expression of RAS-GTP in EV and DAZAP1-OE MM cells. **(D and E)** Relative expressions of DAZAP1 and p-ERK in DAZAP1-OE and DAZAP1-KD MM cells, respectively. **(F and G)** Relative expressions of KITLG and p-ERK in HEK293, CAG and OCI-MY5 cells upon transfection with isoform 1 (994) and isoform 2 (899), respectively.
